# Supplementary material for: Pd-induced Pt(iv) reduction to form Pd@Pt/CNT core@shell catalyst for a more complete oxygen reduction
Source: Royal Society of Chemistry journal article supplement (doi:10.1039/c3ta13139d), 2013-01-01
Supplement: c3ta13139d_2.pdf [file c3ta13139d_2.pdf]

## Pd induced Pt(IV) reduction to form Pd@Pt/CNT core-shell catalyst for a more complete oxygen reduction

Meirong Xia,<sup>a</sup> Ying Liu,<sup>a</sup> Zidong Wei,<sup>\*a</sup> Siguo Chen,<sup>a</sup> Kun xiong,<sup>a</sup> Li Li,<sup>a</sup> Wei Ding,<sup>a</sup>  
Jinsong Hu,<sup>b</sup> Li-Jun Wan,<sup>\*b</sup> Rong Li,<sup>a</sup> and Shahnaz Fatima Alvia<sup>a</sup>

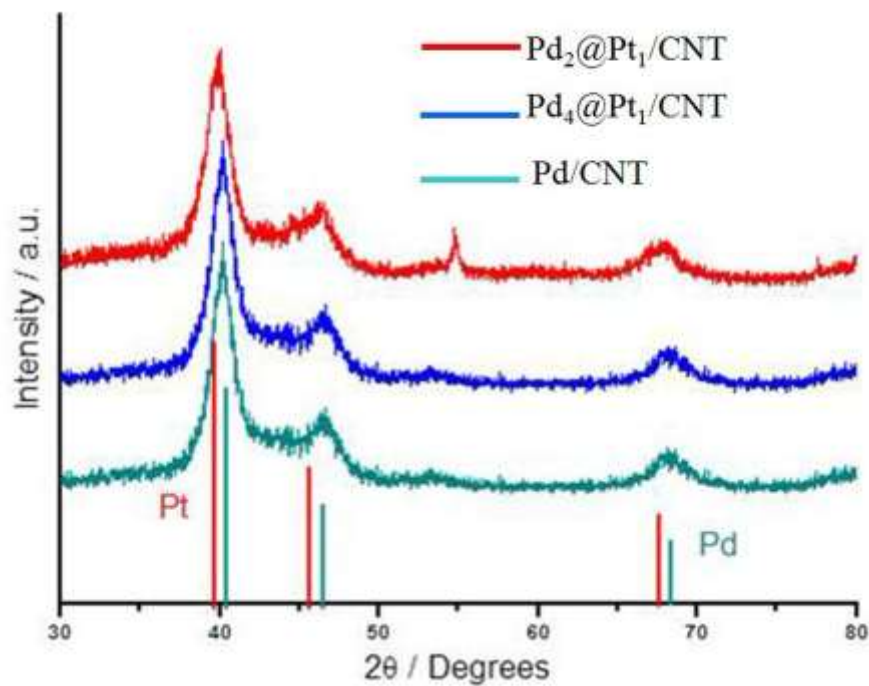

**Fig. S1.** X-ray diffraction of the prepared Pd/CNT, Pd<sub>4</sub>@Pt<sub>1</sub>/CNT and Pd<sub>2</sub>@Pt<sub>1</sub>/CNT.

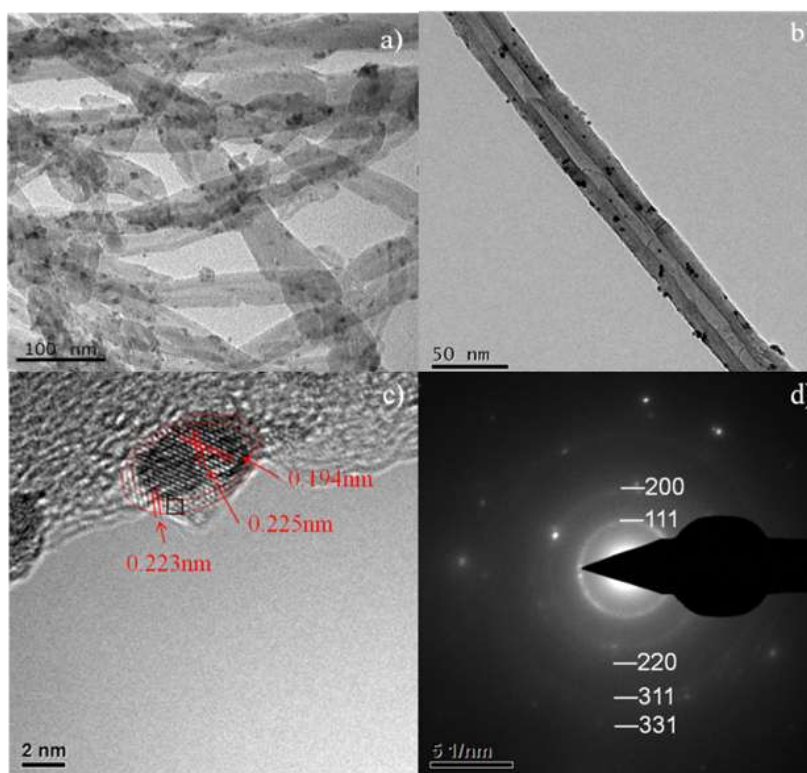

**Fig. S2.** TEM images of Pd/CNT (a) and Pd<sub>2</sub>@Pt<sub>1</sub>/CNT (b). HRTEM image of Pd<sub>2</sub>@Pt<sub>1</sub>/CNT(c), and selected area electron diffraction (d) of the ring in the (c).

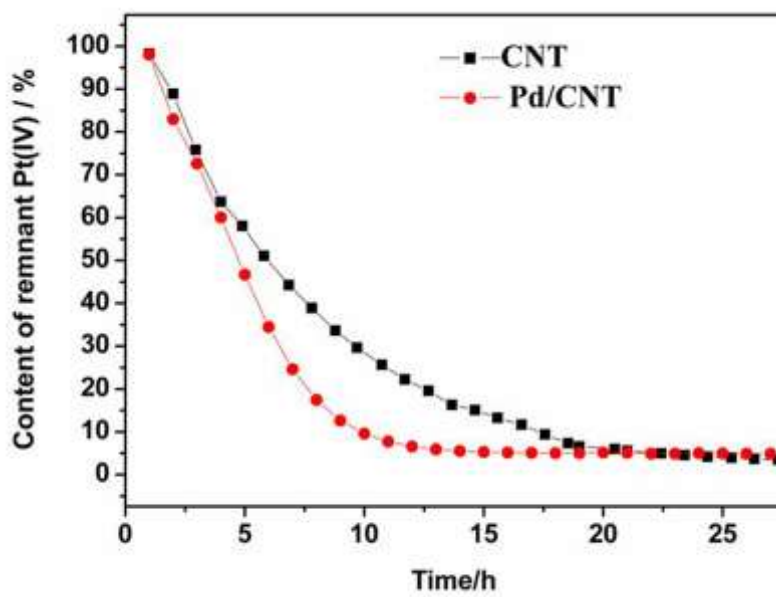

**Fig. S3.** The relative content of remnant  $\text{PtCl}_6^{2-}$  vs. reduction time

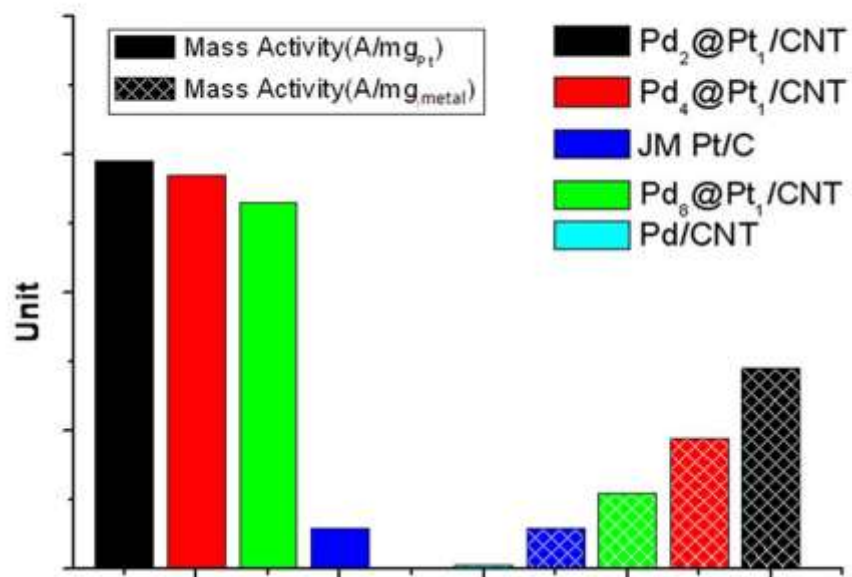

**Fig. S4.** The mass activity (MA, A mg<sup>-1</sup>) at 0.9 V for the different samples.

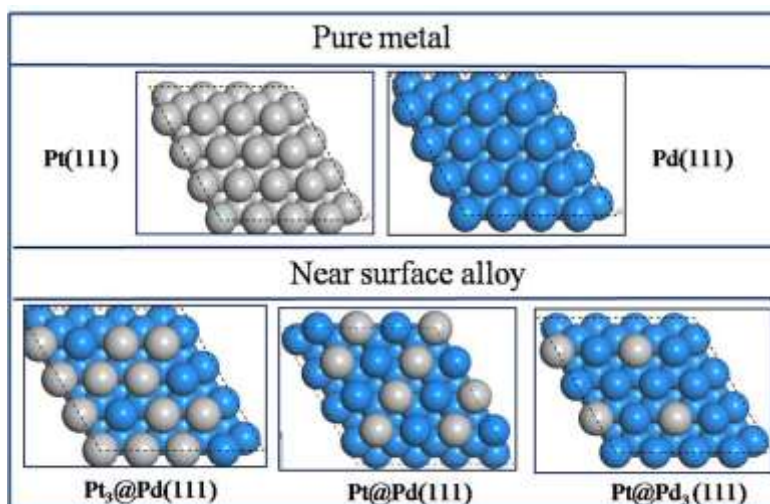

**Fig. S5.** Models of pure metals and near surface alloy PdPt
